# Supplementary material for: On the constitution and thermodynamic modelling of the system Ti–Ni–Sn
Source: Royal Society of Chemistry journal article supplement (doi:10.1039/c5ra16074j), 2015-01-01
Supplement: c5ra16074j1.pdf [file c5ra16074j1.pdf]

Table S1 Crystallographic data of unary and binary phases pertinent to the system Ti-Ni-Sn

| Phase,<br>Temperature range (°C)                                                                          | Space group, Prototype                          | Lattice parameters (nm)                            |                  |                                                     | Comments/References                                                              |
|-----------------------------------------------------------------------------------------------------------|-------------------------------------------------|----------------------------------------------------|------------------|-----------------------------------------------------|----------------------------------------------------------------------------------|
|                                                                                                           |                                                 | a                                                  | b                | c                                                   |                                                                                  |
| $\alpha$ -Ti, rt<br>$\leq 882^\circ\text{C}$ <sup>21</sup>                                                | $P6_3/mmc$<br>Mg $\bar{3}m$                     | 0.29506                                            | -                | 0.46853                                             | Ref.21                                                                           |
| $\beta$ -Ti, ht<br>882-1670°C <sup>21</sup>                                                               | $Im\bar{3}m$<br>W                               | 0.33065                                            | -                | -                                                   | Ref.21                                                                           |
| $\omega$ -Ti, hp                                                                                          | $P6_3/mmm$<br>$\omega$ -Ti                      | 0.4625                                             | -                | 0.2813                                              | Ref.21                                                                           |
| Ni<br>$\leq 1455^\circ\text{C}$ <sup>21</sup>                                                             | $Fm\bar{3}m$<br>Cu                              | 0.35241                                            | -                | -                                                   | Ref.21                                                                           |
| $\alpha$ -Sn<br>$\leq 13^\circ\text{C}$ <sup>21</sup>                                                     | $Fd\bar{3}m$<br>C(diamond)                      | 0.64892                                            | -                | -                                                   | Ref.21                                                                           |
| $\beta$ -Sn<br>13-232°C <sup>21</sup>                                                                     | $I4_1/amd$<br>$\beta$ Sn                        | 0.58318                                            | -                | 0.31818                                             | Ref.21                                                                           |
| Ti <sub>3</sub> Sn, hp                                                                                    | $Pm\bar{3}m$<br>Cu <sub>3</sub> Au              | 0.4176(1)                                          | -                | -                                                   | Ref.28                                                                           |
| Ti <sub>3</sub> Sn<br>$\leq 1670^\circ\text{C}$ <sup>21</sup>                                             | $P6_3/mmc$<br>Mg <sub>3</sub> Cd                | 0.5921                                             | -                | 0.4762                                              | Ref.28                                                                           |
| Ti <sub>2</sub> Sn<br>$\leq 1550^\circ\text{C}$ <sup>21</sup>                                             | $P6_3/mmc$<br>Ni <sub>2</sub> In                | 0.4658                                             | -                | 0.57                                                | Ref.29                                                                           |
| Ti <sub>2</sub> Ni <sub>3</sub> Sn <sub>3</sub><br>$\leq 1510^\circ\text{C}$ <sup>21</sup>                | $P6_3/mcm$<br>Mn <sub>5</sub> Si <sub>3</sub>   | 0.8049                                             | -                | 0.5454                                              | x = 0 <sup>30</sup>                                                              |
|                                                                                                           | $P6_3/mcm$<br>Hf <sub>5</sub> CuSn <sub>3</sub> | 0.81440(1)<br>0.81389(9)<br>0.8128(2)<br>0.8135(4) | -<br>-<br>-<br>- | 0.555922(9)<br>0.55677(3)<br>0.5552(4)<br>0.5551(2) | x = 0.96 [*] SC<br>x = 1 [*] XPD<br>x=1 <sup>31</sup><br>x=1, 1073K <sup>4</sup> |
| Ti <sub>6</sub> Sn <sub>5</sub> , ht<br>790-1490°C <sup>21</sup>                                          | $P6_3/mmc$<br>Ti <sub>6</sub> Sn <sub>5</sub>   | 0.9248                                             | -                | 0.569                                               | Ref.32                                                                           |
| Ti <sub>6</sub> Sn <sub>5</sub> ,rt<br>$\leq 790^\circ\text{C}$ <sup>21</sup>                             | $Immm$<br>Ti <sub>6</sub> Sn <sub>5</sub>       | 0.5735                                             | 0.9144           | 1.6930                                              | Ref.33                                                                           |
| Ti <sub>2</sub> Sn <sub>3</sub><br>$\leq 751^\circ\text{C}$ <sup>21</sup>                                 | $Cmca$<br>Ti <sub>2</sub> Sn <sub>3</sub>       | 0.59556(4)                                         | 1.9964(2)        | 0.70281(5)                                          | Ref.34                                                                           |
| Ti <sub>2</sub> Ni<br>$\leq 984^\circ\text{C}$ <sup>21</sup>                                              | $Fd\bar{3}m$<br>Ti <sub>2</sub> Ni              | 1.1307                                             | -                | -                                                   | Ref.35                                                                           |
| TiNi, ht<br>630-1310 °C <sup>21</sup>                                                                     | $Pm\bar{3}m$<br>CsCl                            | 0.3015                                             | -                | -                                                   | Ref.36                                                                           |
| (Ti <sub>1-x</sub> Ni <sub>x</sub> ) <sub>1-y</sub> Sn <sub>y</sub><br>TiNi<br>martensite                 | $P12_1/m1$<br>TiNi                              | 0.30258(6)<br>0.2884(2)                            | -<br>0.4110(2)   | -<br>0.4665(3)                                      | x = 0.532, y = 0.06 [*]<br>Ref.37                                                |
| TiNi <sub>3</sub><br>$\leq 1380^\circ\text{C}$ <sup>21</sup>                                              | $P6_3/mmc$<br>TiNi <sub>3</sub>                 | 0.5101(2)                                          | -                | 0.8322(2)                                           | [38]                                                                             |
| (Ti <sub>1-x</sub> Sn <sub>x</sub> )Ni <sub>3</sub><br>Ni <sub>3</sub> Sn, ht<br>850-1170°C <sup>21</sup> | $Fm\bar{3}m$<br>BiF <sub>3</sub>                | 0.5144(2)<br>0.598(1)                              | -<br>-           | 0.8393(3)<br>-                                      | x = 0.27 [*]<br>Ref.39                                                           |
| Ni <sub>3</sub> Sn, rt<br>$\leq 975^\circ\text{C}$ <sup>21</sup>                                          | $P6_3/mmc$<br>Mg <sub>3</sub> Cd                | 0.5305                                             | -                | 0.4254                                              | Ref.40                                                                           |
| Ni <sub>3</sub> Sn, hp                                                                                    | $Pm\bar{3}m$<br>Cu <sub>3</sub> Au              | 0.3738(1)                                          | -                | -                                                   | Ref.28                                                                           |
| Ni <sub>1.5</sub> Sn, ht<br>600-1250°C <sup>21</sup>                                                      | $P6_3/mmc$<br>Ni <sub>2</sub> In                | 0.40781                                            | -                | 0.5197                                              | Ref.37                                                                           |
| Ni <sub>3</sub> Sn <sub>2</sub> , rt<br>$\leq 600^\circ\text{C}$ <sup>21</sup>                            | $Pnma$<br>Ni <sub>3</sub> Sn <sub>2</sub>       | 0.71240(9)                                         | 0.51970(4)       | 0.81562(7)                                          | Ref.41                                                                           |
| Ni <sub>3</sub> Sn <sub>4</sub><br>$\leq 795^\circ\text{C}$ <sup>21</sup>                                 | $C12/m1$<br>Ni <sub>3</sub> Sn <sub>4</sub>     | 1.2214(6)                                          | 0.4060(2)        | 0.5219(3)                                           | Ref.42                                                                           |
| NiSn <sup>a</sup>                                                                                         | $Pbam$<br>NiSn                                  | 2.4452(8)                                          | 0.5200(2)        | 0.4091(2)                                           | Ref.43                                                                           |

[\*] - this work

Table S2. EPMA data for the samples annealed at different temperatures (SEM images are shown on Figures 6-8).

| Figure 6                            |      |      |      |                                       | Figure 7                            |      |      |       |                         | Figure 8                            |      |      |      |                         |
|-------------------------------------|------|------|------|---------------------------------------|-------------------------------------|------|------|-------|-------------------------|-------------------------------------|------|------|------|-------------------------|
| Phase <sup>a</sup>                  | at%  |      |      | SEM<br>( $\Delta^b$ ) HT <sup>c</sup> | Phase <sup>a</sup>                  | at%  |      |       | SEM<br>( $\Delta$ ), °C | Phase <sup>a</sup>                  | at%  |      |      | SEM<br>( $\Delta$ ), °C |
|                                     | Ti   | Ni   | Sn   |                                       |                                     | Ti   | Ni   | Sn    |                         |                                     | Ti   | Ni   | Sn   |                         |
| $\tau_2$                            | 25.2 | 49.7 | 25.1 | Fig. 6a                               | $\tau_2$                            | 24.7 | 50.5 | 24.8  | Fig. 7a                 | $\tau_2$                            | 24.4 | 46.8 | 28.8 | Fig. 8a                 |
| $\tau_2'$                           | 18.2 | 58.1 | 23.7 | (-)                                   | $\text{Ni}_3\text{Sn}_2$            | 0.9  | 59.2 | 39.9  | (-)                     | $\text{Ni}_3\text{Sn}_4$            | 0.1  | 44.7 | 55.2 | (-)                     |
| $\text{Ni}_3\text{Sn}_2$            | 2.0  | 62.4 | 35.6 | as-cast                               |                                     |      |      |       | 950°C                   | (Sn)                                | 0.2  | 0.6  | 99.2 | as-cast                 |
| $\tau_1$                            | 31.2 | 37.3 | 31.5 | Fig. 6b                               | $\tau_1$                            | 32.8 | 34.0 | 33.2  | Fig. 7b                 | $\tau_2$                            | 24.5 | 50.2 | 25.3 | Fig. 8b                 |
| $\text{Ti}_5\text{Ni}_x\text{Sn}_3$ | 55.0 | 7.3  | 37.7 | (-)                                   | $\text{Ti}_6\text{Sn}_5$            | 54.0 | 2.2  | 43.8  | (u)                     | $\text{Ni}_3\text{Sn}_2$            | 0.5  | 57.9 | 41.6 | (-)                     |
| (Sn)                                | 1.1  | 0.8  | 98.1 | as-cast                               | (Sn)                                | 0.4  | 0.5  | 99.1  | 950°C                   | $\text{Ni}_3\text{Sn}_4$            | -0.1 | 43.9 | 56.2 | as-cast                 |
|                                     |      |      |      |                                       |                                     |      |      |       |                         | (Sn)                                | 0.1  | 31.5 | 68.4 |                         |
| $\tau_1$                            | 32.1 | 35.6 | 32.3 | Fig. 6c                               | $\tau_1$                            | 33.1 | 33.6 | 33.3  | Fig. 7c                 | $\tau_2$                            | 24.9 | 49.6 | 25.5 | Fig. 8c                 |
| $\text{Ti}_5\text{Ni}_x\text{Sn}_3$ | 56.3 | 6.2  | 37.5 | (-)                                   | $\text{Ti}_5\text{Ni}_x\text{Sn}_3$ | 57.9 | 5.9  | 36.2  | (f)                     | $\text{Ni}_3\text{Sn}_2$            | 0    | 56.2 | 43.8 | (b)                     |
| $\text{Ti}_6\text{Sn}_5$            | 52.8 | 4.4  | 42.8 | as-cast                               | $\text{Ti}_6\text{Sn}_5$            | 54.3 | 2.3  | 43.4  | 950°C                   | $\text{Ni}_3\text{Sn}_4$            | 0    | 46.8 | 53.2 | 700°C                   |
| (Sn)                                | 0.5  | 0.8  | 98.7 |                                       |                                     |      |      |       |                         |                                     |      |      |      |                         |
| $\tau_4$                            | 8.3  | 79.8 | 11.9 | Fig. 6d                               | $\tau_4$                            | 6.2  | 77.4 | 16.4  | Fig. 7d                 | $\tau_2$                            | 25.8 | 48.2 | 26.0 | Fig. 8d                 |
| $\text{Ni}_3\text{Sn}$              | 1.1  | 75.1 | 23.8 | (-)                                   | $\text{Ni}_3\text{Sn}$              | 1.0  | 75.8 | 23.2  | (g)                     | $\text{Ni}_3\text{Sn}_4$            | 0.1  | 45.2 | 54.7 | (-)                     |
| (Ni)                                | 6.5  | 85.0 | 8.5  | as-cast                               | (Ni)                                | 4.2  | 86.8 | 9.0   | 950°C                   | (Sn)                                | 0.4  | 1.9  | 97.7 | as-cast                 |
| $\text{Ni}_3\text{Sn}_2$            | 1.3  | 63.8 | 34.9 | Fig. 6e                               | $\tau_4$                            | 8.1  | 75.5 | 16.4  | Fig. 7e                 | $\tau_1$                            | 32.6 | 34.1 | 33.3 | Fig. 8e                 |
| $\text{Ni}_3\text{Sn}$              | 3.9  | 71.9 | 24.2 | (-)                                   | $\text{Ni}_3\text{Sn}_2$            | 0.4  | 63.4 | 36.2  | (h)                     | $\tau_2$                            | 25.2 | 49.2 | 25.6 | (c)                     |
| e                                   | 7.5  | 71.7 | 20.8 | as-cast                               | $\text{Ni}_3\text{Sn}$              | 1.2  | 73.3 | 25.5  | 950°C                   | $\text{Ni}_3\text{Sn}_4$            | 0    | 46.5 | 53.5 | 600°C                   |
| $\tau_2$                            | 23.3 | 52.3 | 24.4 | Fig. 6f                               | $\tau_2$                            | 23.0 | 52.3 | 24.7  | Fig. 7f                 | $\tau_2$                            | 18.9 | 57.0 | 24.1 | Fig. 8f                 |
| $\text{Ni}_3\text{Sn}_2$            | 2.1  | 62.4 | 35.5 | (-)                                   | $\text{Ni}_3\text{Sn}_2$            | 0.8  | 61.5 | 37.7  | (i)                     | $\text{Ni}_3\text{Sn}_2$            | 1.8  | 62.5 | 35.7 | (i)                     |
| e                                   | 10.1 | 68.9 | 21.0 | as-cast                               | $\text{TiNi}_3$                     | 21.3 | 75.1 | 3.6   | 950°C                   | $\text{TiNi}_3$                     | 19.6 | 75.3 | 5.1  | 1100°C                  |
| $\tau_2$                            | 33.3 | 51.6 | 15.1 | Fig. 6g                               | $\tau_2$                            | 37.3 | 51.5 | 11.2  | Fig. 7g                 | $\tau_1$                            | 31.4 | 37.3 | 31.3 | Fig. 8g                 |
| $\text{TiNi}$                       | 39.8 | 54.7 | 5.5  | (-)                                   | $\text{TiNi}_3$                     | 25.1 | 74.8 | 0.1   | (j)                     | $\text{Ti}_6\text{Sn}_5$            | 53.0 | 4.4  | 42.6 |                         |
| e                                   | 36.0 | 61.1 | 2.9  | as-cast                               | $\text{TiNi}$                       | 41.9 | 52.6 | 5.5   | 950°C                   | (Sn)                                | 0.7  | 0.1  | 99.2 | as-cast                 |
| $\tau_2$                            | 29.4 | 49.4 | 21.2 | Fig. 6h                               | $\tau_2$                            | 40.3 | 50.2 | 9.5   | Fig. 7h                 | $\tau_1$                            | 32.6 | 34.5 | 32.9 | Fig. 8h                 |
| $\tau_2'$                           | 41.6 | 49.9 | 8.5  | (-)                                   | $\tau_3$                            | 41.5 | 40.4 | 18.1  | (k)                     | $\text{Ti}_2\text{Sn}_3$            | 39.9 | 0.5  | 59.6 | (-)                     |
| $\tau_3$                            | 44.3 | 40.1 | 15.6 | as-cast                               | $\text{TiNi}$                       | 44.4 | 50.0 | 5.6   | 950°C                   | (Sn)                                | 1.3  | 0.6  | 98.1 | 700°C                   |
| $\text{TiNi}$                       | ~46  | 50   | 4    |                                       |                                     |      |      |       |                         |                                     |      |      |      |                         |
| e                                   | 50.6 | 34.5 | 14.9 |                                       |                                     |      |      |       |                         |                                     |      |      |      |                         |
| $\tau_2$                            | 27.7 | 48.2 | 24.1 | Fig. 6i                               | $\tau_2$                            | 27.5 | 48.6 | 23.9  | Fig. 7i                 | $\tau_2$                            | 28.9 | 48.9 | 22.2 | Fig. 8i                 |
| $\tau_3$                            | 43.7 | 40.1 | 16.2 | (-)                                   | $\tau_3$                            | 41.8 | 40.0 | 18.2  | (l)                     | $\tau_3$                            | 41.2 | 40   | 18.8 | (l)                     |
| $\text{Ti}_5\text{Ni}_x\text{Sn}_3$ | 55.4 | 11.7 | 32.9 | as-cast                               | $\text{Ti}_5\text{Ni}_x\text{Sn}_3$ | 55.5 | 10.9 | 33.6  | 950°C                   | $\text{Ti}_5\text{Ni}_x\text{Sn}_3$ | 55.6 | 11.1 | 33.3 | 1050°C                  |
| $\text{TiNi}$                       | 43.1 | 49.5 | 7.4  |                                       |                                     |      |      |       |                         |                                     |      |      |      |                         |
| e                                   | 49.2 | 37.0 | 13.8 |                                       |                                     |      |      |       |                         |                                     |      |      |      |                         |
| $\text{Ti}_5\text{Ni}_x\text{Sn}_3$ | 55.7 | 9.7  | 34.6 | Fig. 6j                               | $\tau_1$                            | 32.8 | 34.7 | 32.5  | Fig. 7j                 | $\tau_2$                            | 37.8 | 49.5 | 12.7 | Fig. 8j                 |
| e                                   | 41.0 | 29.6 | 29.4 | (-)                                   | $\tau_2$                            | 28.1 | 46.3 | 25.6  | (m)                     | $\tau_3$                            | 43.8 | 40.1 | 16.1 | (-)                     |
| $\tau_2$                            | 27.8 | 46.5 | 25.7 | as-cast                               | $\text{Ti}_5\text{NiSn}_3$          | 55.2 | 11.2 | 33.6  | 950°C                   | $\text{Ti}_5\text{Ni}_x\text{Sn}_3$ | 55.6 | 11.4 | 33.0 | as-cast                 |
|                                     |      |      |      |                                       |                                     |      |      |       |                         | $\text{TiNi}$                       | 44.8 | 49.2 | 6.0  |                         |
|                                     |      |      |      |                                       |                                     |      |      |       |                         | e                                   | 49.1 | 38.0 | 12.9 |                         |
| $\text{Ti}_5\text{Ni}_x\text{Sn}_3$ | 56.2 | 10.7 | 33.1 | Fig. 6k                               | $\tau_3$                            | 43.8 | 40.1 | 16.1  | Fig. 7k                 | $\tau_1$                            | 30.9 | 38.0 | 31.1 | Fig. 8k                 |
| e                                   | 48.8 | 38.2 | 13.0 | (-)                                   | $\text{Ti}_5\text{Ni}_x\text{Sn}_3$ | 56.6 | 10.6 | 32.8  | (n)                     | $\tau_2$                            | 27.5 | 45.3 | 27.2 | (-)                     |
|                                     |      |      |      | as-cast                               | $\text{TiNi}$                       | 47.5 | 49.9 | 2.6   | 950°C                   | $\text{Ti}_5\text{Ni}_x\text{Sn}_3$ | 55.8 | 10.1 | 34.1 | as-cast                 |
|                                     |      |      |      |                                       |                                     |      |      |       |                         | (Sn)                                | 0.5  | 1.4  | 98.1 |                         |
| $\text{Ti}_5\text{Ni}_x\text{Sn}_3$ | 56.5 | 11.0 | 32.5 | Fig. 6l                               | $\text{Ti}_5\text{Ni}_x\text{Sn}_3$ | 56.2 | 11   | 32.8  | Fig. 7l                 | $\tau_3$                            | 45.0 | 40.3 | 14.7 | Fig. 8l                 |
| $\text{Ti}_3\text{Sn}$              | 72.9 | 2.4  | 24.7 | (-)                                   | $\text{Ti}_3\text{Sn}$              | 73.8 | 1.2  | 25.0  | (o)                     | $\text{Ti}_5\text{Ni}_x\text{Sn}_3$ | 57.0 | 7.2  | 35.8 | (-)                     |
| e                                   | 57.4 | 33.0 | 9.6  | as-cast                               | $\text{TiNi}$                       | 49.6 | 48.3 | 2.1   | 950°C                   | e                                   | 49.9 | 36.2 | 13.9 | as-cast                 |
| $\text{Ti}_3\text{Sn}$              | 74.2 | 1.6  | 24.2 | Fig. 6m                               | $\text{TiNi}$                       | 50   | 50   | 0     | Fig. 7m                 | $\tau_2$                            | 23.7 | 51.3 | 25.0 | Fig. 8m                 |
| $\text{Ti}_2\text{Ni}$              | 64.8 | 33.4 | 1.8  | (-)                                   | $\text{Ti}_2\text{Ni}$              | 65.4 | 33.6 | 1.0   | (p)                     | $\text{Ni}_3\text{Sn}_2$            | 0.6  | 59.1 | 40.3 | (-)                     |
| $\text{TiNi}$                       | 50.1 | 49.6 | 0.3  | as-cast                               | $\text{Ti}_3\text{Sn}$              | 74.4 | 1.5  | 24.1  | 950°C                   | e                                   | 6.3  | 57.6 | 36.1 | as-cast                 |
| $\text{Ti}_3\text{Sn}$              | 79.1 | 1.0  | 19.9 | Fig. 6n                               | $\text{Ti}_3\text{Sn}$              | 77.7 | 1.0  | 21.3  | Fig. 7n                 | $\tau_1$                            | 30.8 | 38.1 | 31.1 | Fig. 8n                 |
| $\text{Ti}_2\text{Ni}$              | 66.0 | 33.1 | 0.9  | (-)                                   | $\text{Ti}_2\text{Ni}$              | 66.3 | 33.1 | 0.6   | (q)                     | $\tau_2$                            | 26.8 | 46.3 | 26.9 | (c)                     |
| (Ti)                                | 83.6 | 5.8  | 10.6 | as-cast                               | (Ti)                                | 86.4 | 5.5  | 8.1   | 950°C                   | $\text{Ni}_3\text{Sn}_4$            | 1.3  | 28.5 | 70.2 | 1100°C                  |
| $\tau_2$                            | 25.1 | 49.4 | 25.5 | Fig. 6o                               | $\tau_2$                            | 24.9 | 49.9 | 25.2  | Fig. 7o                 | $\tau_2$                            | 29.5 | 49.9 | 20.6 | Fig. 8o                 |
| $\text{Ni}_3\text{Sn}_2$            | 0.4  | 56.8 | 42.8 | (-)                                   | $\text{Ni}_3\text{Sn}_2$            | 0.2  | 56.9 | 42.9  | (s)                     | $\text{TiNi}$                       | 41.3 | 50.8 | 7.9  | (-)                     |
| $\text{Ni}_3\text{Sn}_4$            | 0.4  | 46.1 | 53.5 | as-cast                               | (Sn)                                | 0.07 | 0.95 | 98.98 | 950°C                   |                                     |      |      |      | as-cast                 |
| (Sn)                                | 0.2  | 0.1  | 99.7 |                                       |                                     |      |      |       |                         |                                     |      |      |      |                         |

<sup>a</sup> binary solid solutions ( $\text{Ti}_{1-x}\text{Ni}_x$ )<sub>1-y</sub> $\text{Sn}_y$  and  $\text{Ti}_{1-x}\text{Sn}_x\text{Ni}_3$  are denoted as TiNi and  $\text{TiNi}_3$ , respectively; <sup>b</sup> three-phase equilibria; <sup>c</sup> heat treatment.

Table S3. X-ray Rietveld refinement for  $\tau_1$ -TiNiSn and  $\tau_2$ -Ti<sub>1+y</sub>Ni<sub>2-x</sub>Sn<sub>1-y</sub>

| Parameter/compound              | $\tau_1$ -TiNiSn                                            | $\tau_2$ -Ti <sub>1+y</sub> Ni <sub>2-x</sub> Sn <sub>1-y</sub> |                                                          |                                                          |
|---------------------------------|-------------------------------------------------------------|-----------------------------------------------------------------|----------------------------------------------------------|----------------------------------------------------------|
| Space group, Prototype          | $F\bar{4}3m$ , MgAgAs                                       | $Fm\bar{3}m$ , MnCu <sub>2</sub> Al -                           |                                                          |                                                          |
| Composition:                    |                                                             |                                                                 |                                                          |                                                          |
| EPMA, at%                       | Ti <sub>32.55</sub> Ni <sub>34.90</sub> Sn <sub>32.55</sub> | Ti <sub>25.2</sub> Ni <sub>49.7</sub> Sn <sub>25.1</sub>        | Ti <sub>38.6</sub> Ni <sub>50.7</sub> Sn <sub>10.7</sub> | Ti <sub>21.8</sub> Ni <sub>53.7</sub> Sn <sub>24.5</sub> |
| x; y                            | 0.928; 0.000                                                | 0.024; 0.002                                                    | -0.057; 0.566                                            | -0.320; -0.058                                           |
| Refinement; at%                 | Ti <sub>33.3</sub> Ni <sub>33.3</sub> Sn <sub>33.3</sub>    | Ti <sub>25.0</sub> Ni <sub>50.0</sub> Sn <sub>25.0</sub>        | Ti <sub>39.2</sub> Ni <sub>50.0</sub> Sn <sub>10.8</sub> | Ti <sub>21.5</sub> Ni <sub>53.5</sub> Sn <sub>25.0</sub> |
| x; y                            | 1.000; 0.000                                                | 0.000; 0.000                                                    | 0.000; 0.568                                             | -0.301; -0.075                                           |
| a [nm], Rietveld                | 0.593633(3)                                                 | 0.60834(2)                                                      | 0.60642(2)                                               | 0.607634(6)                                              |
| a [nm], Ge standard             | 0.59349(1)                                                  | 0.60854(3)                                                      | 0.60605(5)                                               | -                                                        |
| Reflections measured            | 15                                                          | 15                                                              | 18                                                       | 16                                                       |
| R <sub>i</sub>                  | 3.61                                                        | 2.14                                                            | 4.05                                                     | 3.91                                                     |
| R <sub>F</sub>                  | 1.80                                                        | 2.35                                                            | 5.32                                                     | 3.21                                                     |
| R <sub>wp</sub>                 | 5.19                                                        | 3.91                                                            | 2.98                                                     | 3.31                                                     |
| R <sub>p</sub>                  | 3.14                                                        | 2.25                                                            | 1.90                                                     | 1.94                                                     |
| R <sub>exp</sub>                | 2.38                                                        | 2.09                                                            | 2.44                                                     | 2.25                                                     |
| Chi <sup>2</sup>                | 4.75                                                        | 3.51                                                            | 1.49                                                     | 2.17                                                     |
| Atom parameters:                |                                                             |                                                                 |                                                          |                                                          |
| 4a (0,0,0), occ <sup>a</sup>    | 4 Sn                                                        | 4 Sn                                                            | 1.73 Sn + 2.27 Ti                                        | 4 Sn                                                     |
| occ <sup>b</sup>                | 4.04(1) Sn                                                  | 4.05(1) Sn                                                      | 1.49(1) Sn+2.51 Ti                                       | 4.06(6) Sn                                               |
| B <sub>iso</sub>                | 0.71                                                        | 0.28                                                            | 0.49                                                     | 0.42                                                     |
| 4b (½,½,½), occ <sup>a</sup>    | 4.0 Ti                                                      | 4 Ti                                                            | 4 Ti                                                     | 3.44 Ti+ 0.56 Ni                                         |
| occ <sup>b</sup>                | 3.99(1)                                                     | 4.02(1)                                                         | 4.05(1)                                                  | 3.48(3) Ti+0.52 Ni                                       |
| B <sub>iso</sub>                | 0.36                                                        | 0.36                                                            | 0.48                                                     | 0.51                                                     |
| 4c/8c (¼,¼,¼), occ <sup>a</sup> | 4 Ni                                                        | 8 Ni                                                            | 8 Ni                                                     | 8 Ni                                                     |
| occ <sup>b</sup>                | 4.00(1) Ni                                                  | 7.96(2) Ni                                                      | 7.85(7) Ni                                               | 8.03(8) Ni                                               |
| B <sub>iso</sub>                | 0.41                                                        | 0.95                                                            | 1.25                                                     | 0.68                                                     |
| Secondary phases                | Ni <sub>3</sub> Sn <sub>4</sub>                             | -                                                               | -                                                        | Ni <sub>3</sub> Sn <sub>2</sub> +TiNi <sub>3</sub>       |

<sup>a</sup> fixed after EPMA for final refinement; <sup>b</sup> refined occupancy
